# Supplementary material for: Extracellular Particles as Carriers of Cholesterol Not Associated with Lipoproteins
Source: MDPI journal article supplement (doi:10.3390/membranes12060618), 2022-06-14
Supplement: s1 [file s1]

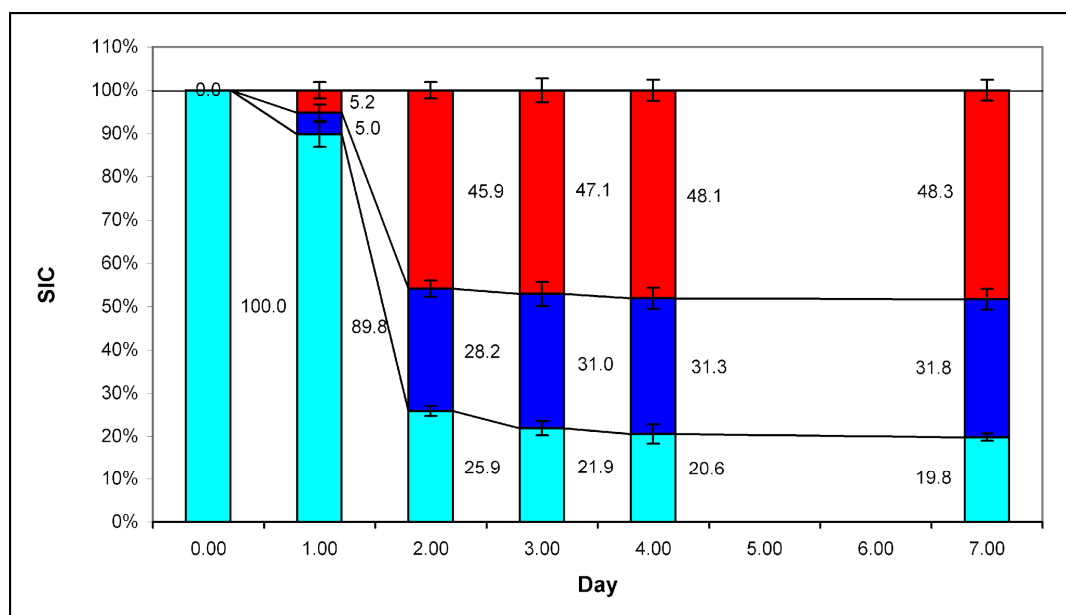

**Supplement Figure S1.** Dynamics of changes in contributions to scattering (SIC – scattering intensity distribution) of 3 particle fractions (BSA – cyan colour, exomeres – blue colour and exosomes – red colour) in conditioned medium samples depending on the cultivation time of a monolayer of cells after changing the culture medium. On the X-axis is the cultivation time and on the Y-axis – is the contribution to the scattering of the fraction (SIC) to the total scattering of the sample under study. The numbers on the graph – SIC of this fraction in %. It is important to note two things. First, the sum of contributions to the scattering of all fractions of particles is always equal to 100%. The second is that the contribution of exomeres and exosomes to scattering increases, while the contribution of albumin decreases during the first three days after changing the medium, and then both of them reach a plateau. Therefore, in all experiments, except for those where the dynamics of EPs accumulation was studied, CM samples were taken on the 4th day of cultivation.

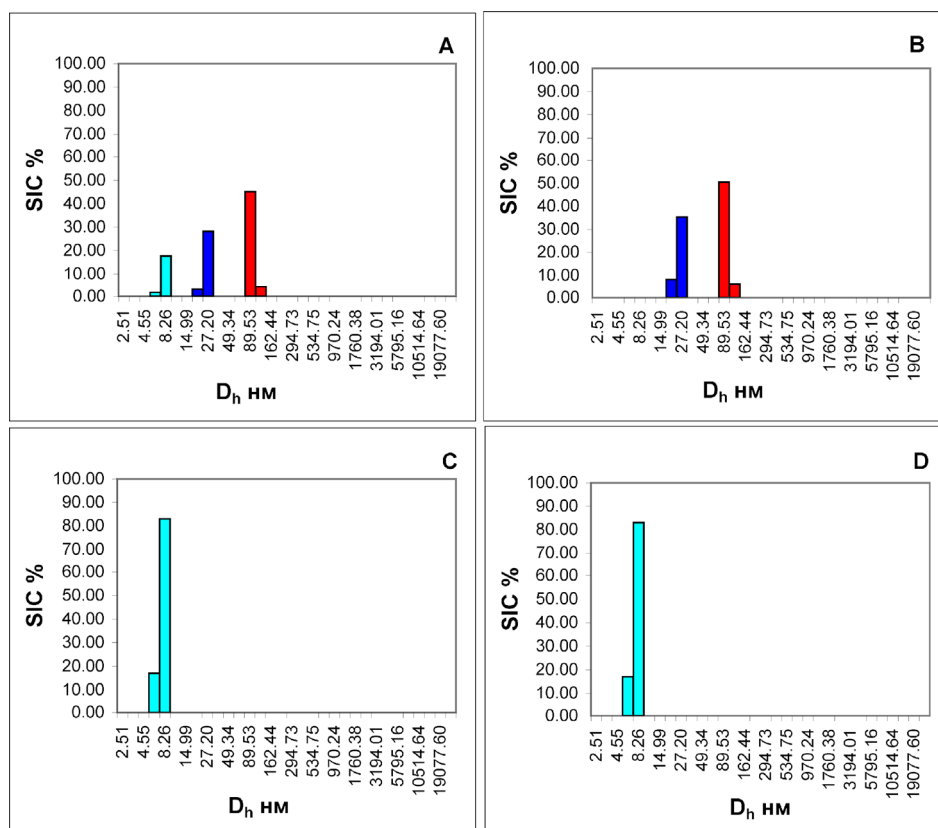

**Supplement Figure S2.** Histograms of particle size distribution (PSD) in a conditioned medium with the addition of serum (A) and without the addition of serum (B) after 4 days of cultivation of GI-Tr cell culture, pure culture medium (C) and bovine serum albumin solution (D). On the X-axis is the hydrodynamic diameter of the particles ( $D_h$ ) in nm, on the Y-axis is the contribution of particles of a given size to the total scattering of the sample (SIC) in %.

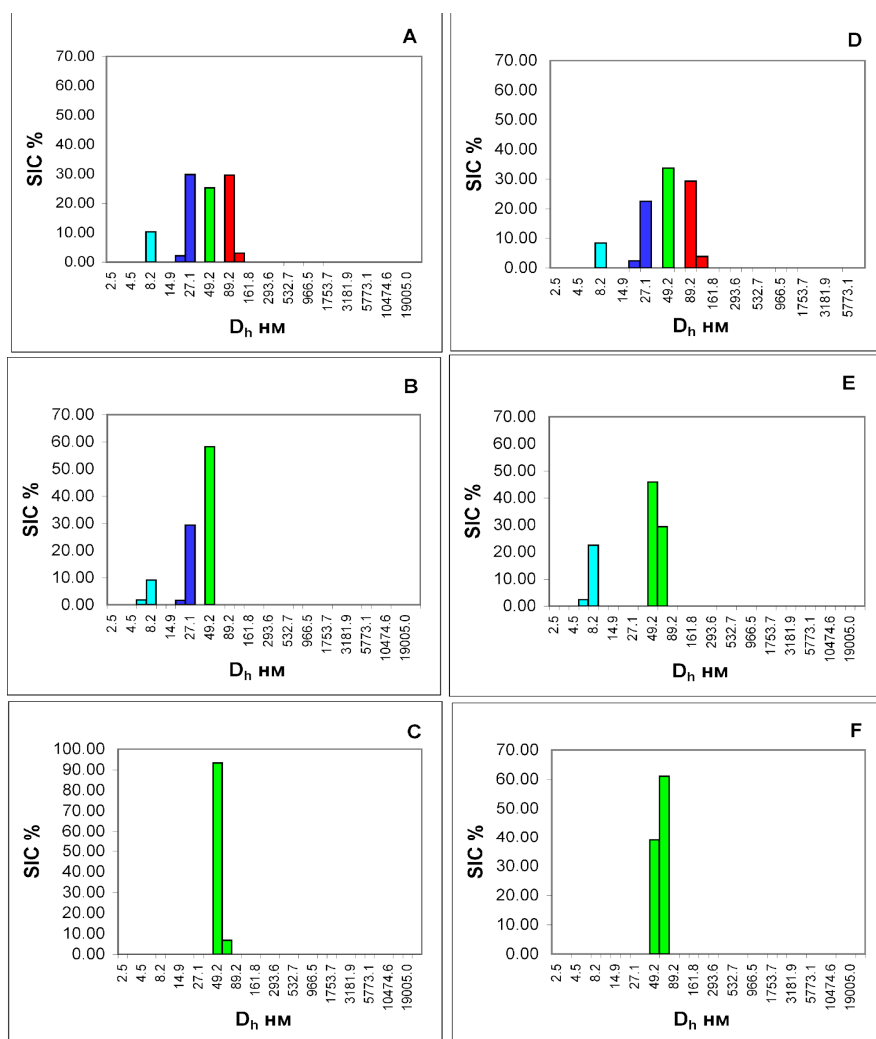

**Supplement Figure S3.** Particles size distribution (PSD) of conditioned media samples. On the X-axis is the hydrodynamic diameter of the particles ( $D_h$ ) in nm, on the Y-axis is the contribution of particles of a given size to the total scattering of the sample (SIC) in %.

Panel A - PSD Conditioned medium immediately after addition of Triton X-100 at a final concentration of 2 mM/L

Panel B - PSD of Conditioned medium one hour after incubation with Triton X-100 at 37°C at the same concentration

Panel C - Triton X-100 micelles in PBS are given for control

Panel D - PSD Conditioned medium immediately after adding saponin at a final concentration of 0.08%

Panel E - PSD of Conditioned medium one hour after incubation with saponin at 37°C at the same concentration

Panel F - Saponin micelles in PBS are given for control.

**Supplement Table S1.** Identification of biomarkers by means of DLS combined with immunoprecipitation on HDL standard sample particles

| No | ID                                                  | Peak 1   |           | Peak 2   |       | Peak 3   |       | Peak 4       |          |
|----|-----------------------------------------------------|----------|-----------|----------|-------|----------|-------|--------------|----------|
|    |                                                     | $D_h$ nm | SIC %     | $D_h$ nm | SIC % | $D_h$ nm | SIC % | $D_h$ nm     | SIC %    |
| 1  | $^2\text{HDL}$ ( $^1\text{N}=5$ )                   | 9.5±0.31 | 100.0     | –        | –     | –        | –     | –            | –        |
| 2  | $^3\text{HDL} + \text{PrA}$ (N=5)                   | 9.8±0.18 | 99.6±0.28 | –        | –     | –        | –     | 717.6±5*E-14 | 0.4±0.28 |
| 3  | $^4\text{HDL} + \text{PrA} + \text{AntiCD9}$ (N=5)  | 9.5±0.02 | 99.6±0.37 | –        | –     | –        | –     | 717.6±5*E-14 | 0.4±0.37 |
| 4  | $^5\text{HDL} + \text{PrA} + \text{AntiCD63}$ (N=5) | 9.7±0.18 | 99.6±0.30 | –        | –     | –        | –     | 717.6±5*E-14 | 0.4±0.30 |
| 5  | $^6\text{HDL} + \text{PrA} + \text{AntiCD81}$ (N=5) | 9.7±0.06 | 99.6±0.36 | –        | –     | –        | –     | 717.6±5*E-14 | 0.5±0.36 |

|   |                                           |          |           |   |   |   |   |              |          |
|---|-------------------------------------------|----------|-----------|---|---|---|---|--------------|----------|
| 6 | <sup>7</sup> HDL + PrA+ AntiHSP90 (N=5)   | 9.8±0.11 | 99.7±0.22 | – | – | – | – | 717.6±5*E-14 | 0.3±0.22 |
| 7 | <sup>8</sup> HDL + PrA+ AntiApoA1 (N=5)   | –        | –         | – | – | – | – | 787.9±7.48   | 100      |
| 8 | <sup>9</sup> HDL + PrA+ AntiApoB100 (N=5) | 9.9±0.08 | 99.7±0.21 | – | – | – | – | 717.6±5*E-14 | 0.3±0.21 |

<sup>1</sup>N – Number of repeated measurements

<sup>2</sup>HDL – HDL standard sample solution

<sup>3</sup>HDL + PrA – HDL standard sample solution and PrA/S (negative control 1)

<sup>4</sup>HDL + PrA+ AntiCD9 – HDL standard sample solution and PrA/S and antiCD9 antibody (see material and methods)

<sup>5</sup>HDL + PrA+ AntiCD63 – HDL standard sample solution and PrA/S and antiCD63 antibody

<sup>6</sup>HDL + PrA+ AntiCD81 – HDL standard sample solution and PrA/S and antiCD81 antibody

<sup>7</sup>HDL + PrA+ AntiHSP90 – HDL standard sample solution and PrA/S and antiHSP90 antibody

<sup>8</sup>HDL + PrA+ AntiApoA1 – HDL standard sample solution and PrA/S and antiApoA1 antibody (positive control)

<sup>9</sup>HDL + PrA+ AntiApoB100 – HDL standard sample solution and PrA/S and antiApoB100 antibody (negative control 2)

**Table S2.** Identification of biomarkers by means of DLS combined with immunoprecipitation on LDL standard sample particles

| № | ID                                        | Peak 1            |       | Peak 2            |           | Peak 3            |       | Peak 4                    |          |
|---|-------------------------------------------|-------------------|-------|-------------------|-----------|-------------------|-------|---------------------------|----------|
|   |                                           | D <sub>h</sub> nm | SIC % | D <sub>h</sub> nm | SIC %     | D <sub>h</sub> nm | SIC % | D <sub>h</sub> nm         | SIC %    |
| 1 | <sup>2</sup> LDL ( <sup>1</sup> N=5)      | –                 | –     | 19.2±0.43         | 100.0     |                   |       | –                         | –        |
| 2 | <sup>3</sup> LDL + PrA (N=5)              | –                 | –     | 19.1±0.23         | 99.6±0.16 |                   |       | 717.6±5×10 <sup>-14</sup> | 0.4±0.16 |
| 3 | <sup>4</sup> LDL + PrA+ AntiCD9 (N=5)     | –                 | –     | 19.1±0.24         | 99.6±0.29 |                   |       | 717.6±5×10 <sup>-14</sup> | 0.4±0.29 |
| 4 | <sup>5</sup> LDL + PrA+ AntiCD63 (N=5)    | –                 | –     | 19.0±0.24         | 99.7±0.24 |                   |       | 717.6±5×10 <sup>-14</sup> | 0.3±0.24 |
| 5 | <sup>6</sup> LDL + PrA+ AntiCD81 (N=5)    | –                 | –     | 19.0±0.16         | 99.7±0.17 |                   |       | 717.6±5×10 <sup>-14</sup> | 0.3±0.17 |
| 6 | <sup>7</sup> LDL + PrA+ AntiHSP90 (N=5)   | –                 | –     | 19.0±0.18         | 99.8±0.30 |                   |       | 717.6±5×10 <sup>-14</sup> | 0.2±0.30 |
| 7 | <sup>8</sup> LDL + PrA+ AntiApoA1 (N=5)   | –                 | –     | 19.1±0.15         | 99.7±0.17 |                   |       | 717.6±5×10 <sup>-14</sup> | 0.3±0.17 |
| 8 | <sup>9</sup> LDL + PrA+ AntiApoB100 (N=5) | ---               | –     | –                 | –         |                   |       | 764.7±6.96                | 100      |

Footnotes are the same as in Table S1

**Supplement Table S3.** Descriptive statistics of the results of exomeres and exosomes from plasma samples measurement by DLS method and lipid profile data from volunteers who participated in the studies (N=41)

| Group                        | Mean  | SD   | Cv %  | Min.  | Q1    | Median | Q3    | Max.  |
|------------------------------|-------|------|-------|-------|-------|--------|-------|-------|
| Exomeres D <sub>h</sub> , nm | 25.85 | 0.64 | 2.48  | 24.29 | 25.41 | 26.00  | 26.3  | 26.89 |
| Exomeres SIC %               | 13.85 | 7.1  | 51.26 | 2.85  | 7.79  | 12.74  | 18.19 | 29.57 |
| Exosomes D <sub>h</sub> , nm | 91.07 | 2.25 | 2.47  | 89.66 | 89.75 | 90.07  | 90.42 | 96.91 |
| Exosomes SIC %               | 20.15 | 1.87 | 9.28  | 15.88 | 19.06 | 20.06  | 21.8  | 23.94 |
| LDL SIC %                    | 1.49  | 0.77 | 51.43 | 0.18  | 0.92  | 1.37   | 1.88  | 3.87  |
| Total cholesterol mmol/l     | 6.48  | 1.26 | 19.44 | 4.23  | 5.44  | 6.54   | 7.45  | 9.23  |
| LDL cholesterol mmol/l       | 3.44  | 0.89 | 25.87 | 1.71  | 2.66  | 3.51   | 3.98  | 6.14  |
| VLDL cholesterol mmol/l      | 0.64  | 0.3  | 46.88 | 0.21  | 0.35  | 0.57   | 0.82  | 1.34  |
| HDL cholesterol mmol/l       | 2.4   | 0.57 | 23.75 | 1.4   | 2.03  | 2.29   | 2.69  | 3.9   |

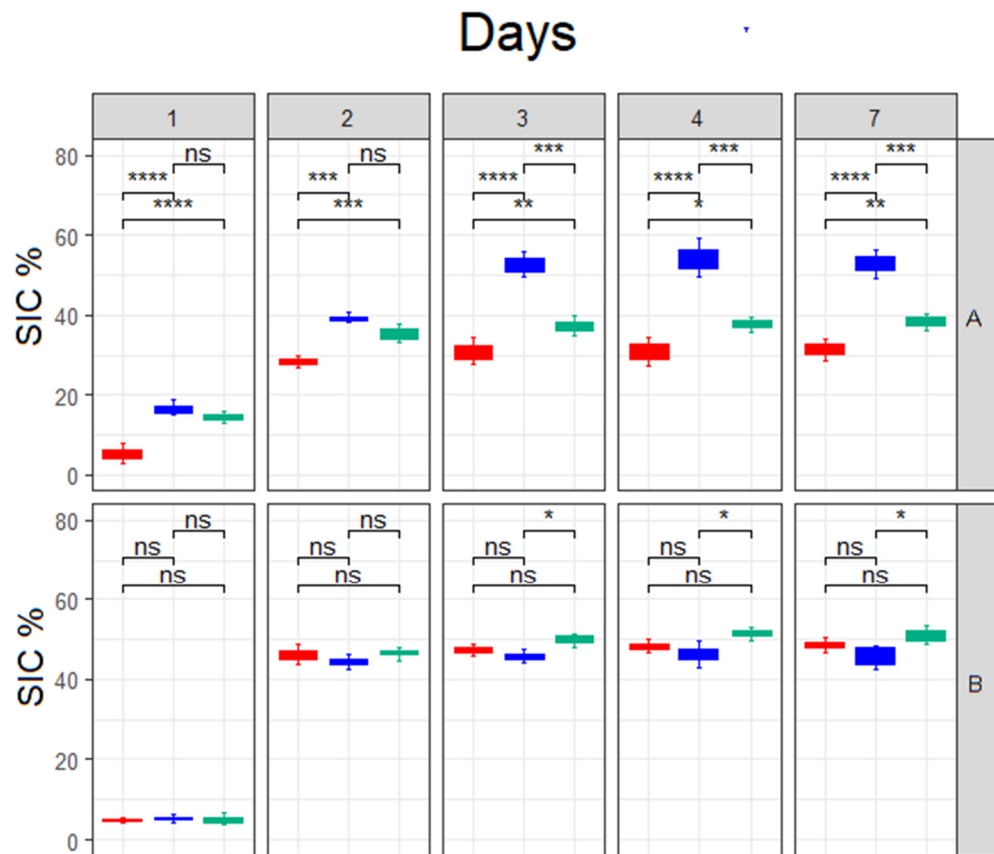

**Supplement Figure S4.** The reliability of the data shown in Fig.5. A – exomeres, B – exosomes, red color – control, blue color – single addition of insulin to the culture medium, green color – daily addition of insulin to the culture medium. At the top is the p-value score. ns –  $p > 0.05$ ; – \*:  $p \leq 0.05$ ; – \*\*:  $p \leq 0.01$ ; – \*\*\*:  $p \leq 0.001$ ; \*\*\*\* –  $p \leq 0.0001$

**Supplement Table S4.** P-value values in pairs of graphs in Figure 5

| Exomeres (A) |                        |                     |                      |                        |                     |
|--------------|------------------------|---------------------|----------------------|------------------------|---------------------|
| 1 – 2        | 0.000075 $p < 0.000^1$ | 0.00072 $p < 0.001$ | 0.00008 $p < 0.0001$ | 0.000033 $p < 0.000^1$ | 0.000001 $p < 0.01$ |
| 1 – 3        | 0.000077 $p < 0.000^1$ | 0.00088 $p < 0.001$ | 0.00077 $p < 0.001$  | 0.011 $p < 0.05$       | 0.00039 $p < 0.01$  |
| 2 – 3        | 0.072 $ns^1$           | 0.19 $ns^1$         | 0.00035 $p < 0.001$  | 0.0001 $p < 0.01$      | 0.00014 $p < 0.001$ |
| Exosomes (B) |                        |                     |                      |                        |                     |
| 1 – 2        | 0.74 $ns^1$            | 0.55 $ns^1$         | 0.68 $ns^1$          | 0.19 $ns^1$            | 0.19 $ns^1$         |
| 1 – 3        | 0.66 $ns^1$            | 0.59 $ns^1$         | 0.12 $ns^1$          | 0.27 $ns^1$            | 0.28 $ns^1$         |
| 2 – 3        | 0.20 $ns^1$            | 0.25 $ns^1$         | 0.044 $p < 0.05$     | 0.017 $p < 0.05$       | 0.039 $p < 0.05$    |

Footnote:

<sup>1</sup> ns – not significant

**Supplement Table S5.** Asymmetry of distribution of measurements by the DLS method results for exomeres and exosomes from plasma samples and lipid profile data in three groups.

| Group                        | Control (N=19) | Before therapy (N=22) | After therapy (N=22) |
|------------------------------|----------------|-----------------------|----------------------|
| Exomeres D <sub>n</sub> , nm | -0.02          | -0.03                 | 0.01                 |
| Exomeres SIC %               | -0.107         | 0.01                  | -0.09                |
| Exosomes D <sub>n</sub> , nm | 0.02           | 0.02                  | -0.01                |
| Exosomes SIC %               | 0.01           | 0.00                  | 0.00                 |
| LDL SIC %                    | 0.06           | 0.12                  | -0.02                |
| Total cholesterol mmol/l     | 0.00           | 0.03                  | -0.04                |
| LDL cholesterol mmol/l       | 0.13           | 0.15                  | 0.23                 |
| VLDL cholesterol mmol/l      | 2.36           | 2.69                  | 0.25                 |
| HDL cholesterol mmol/l       | -0.05          | 0.17                  | -0.08                |

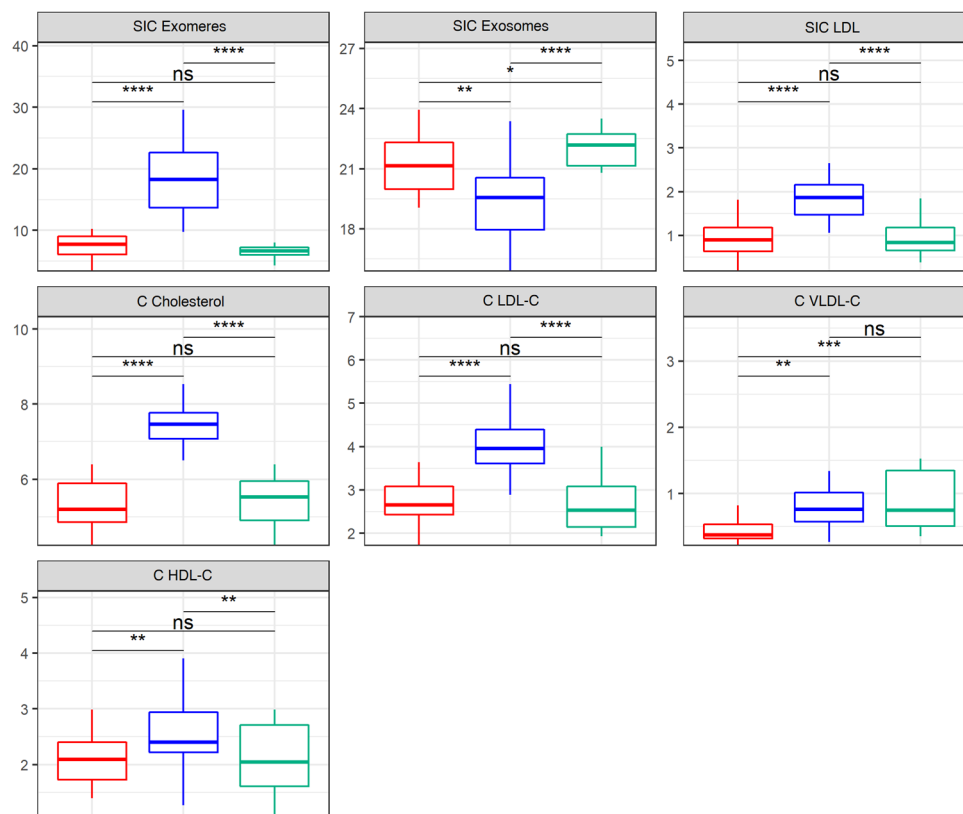

**Supplement Figure S5.** Descriptive statistics of contributions to the dispersion of exomeres, exosomes and lipid profile data in three groups of volunteers who participated in the study. Control group – red color N =19, Group «Before Therapy» – blue color N = 22, and Group «After Therapy» – green color N = 22. p-value: ns –  $p > 0.05$ ; – \*:  $p \leq 0.05$ ; – \*\*:  $p \leq 0.01$ ; – \*\*\*:  $p \leq 0.001$ ; \*\*\*\* –  $p \leq 0.0001$ )

**Supplement Table S6.** The kurtosis of the distribution of the results of measurement by the DLS method of exomeres and exosomes from plasma samples and lipid profile data in three groups.

| Group                        | Control (N=19) | Before therapy (N=22) | After therapy (N=22) |
|------------------------------|----------------|-----------------------|----------------------|
| Exomeres D <sub>h</sub> , nm | -0.030         | 0.026                 | -0.009               |
| Exomeres SIC %               | -0.04          | -0.063                | 0.004                |
| Exosomes D <sub>h</sub> , nm | 0.018          | 0.022                 | 0.001                |
| Exosomes SIC %               | -0.042         | -0.026                | -0.068               |
| LDL SIC %                    | 0.056          | 0.012                 | -0.018               |
| Total cholesterol mmol/l     | -0.022         | -0.069                | -0.018               |
| LDL cholesterol mmol/l       | -0.075         | 0.018                 | -0.228               |
| VLDL cholesterol mmol/l      | 2.110          | 9.068                 | -1.974               |
| HDL cholesterol mmol/l       | -0.034         | 0.014                 | -0.059               |

**Supplement Table 7.** Pearson correlation and partial correlation coefficients of lipid profile parameters and SIC exosomes in the control group

|              | SIC Exosomes | Cholesterol   | LDL-C          | VLDL-C        | HDL-C       |
|--------------|--------------|---------------|----------------|---------------|-------------|
| SIC Exosomes |              | -0.40' (ns)   | -0.36' (ns)    | -0.46'' (ns)  | -0.13 (ns)  |
| Cholesterol  | 0.29' (ns)   |               | 0.80'' (****)  | 0.49'' (*)    | 0.41' (ns)  |
| LDL-C        | -0.08 (ns)   | 0.72'' (****) |                | 0.59'' (*)    | -0.14 (ns)  |
| VLDL-C       | -0.39' (ns)  | 0.50'' (**)   | -0.34' (ns)    |               | -0.28' (ns) |
| HDL-C        | -0.18 (ns)   | 0.74'' (****) | -0.84'' (****) | -0.60'' (***) |             |

<sup>1</sup>ns:  $p > 0.05$ ; \*  $p \leq 0.05$ ; \*\*  $p \leq 0.01$ , - \*\*\*:  $p \leq 0.001$ , - \*\*\*\*:  $p \leq -0.0001$

<sup>2</sup>Cyan color – Pearson correlation, Light green color – partial correlation

<sup>3</sup>'' – strong correlation, ' – medium correlation, no marks – weak correlation

**Supplement Table 8.** Pearson correlation and partial correlation coefficients of lipid profile parameters and SIC exosomes in the group "Before therapy"

|              | SIC Exomeres | Cholesterol    | LDL-C          | VLDL-C     | HDL-C        |
|--------------|--------------|----------------|----------------|------------|--------------|
| SIC Exosomes |              | -0.57'' (****) | -0.28'' (****) | 0.42' (ns) | -0.47'' (**) |
| Cholesterol  | 0.20 (ns)    |                | 0.74'' (****)  | 0.19 (ns)  | 0.08 (****)  |
| LDL-C        | 0.10 (ns)    | -0.81'' (****) |                | 0.34' (ns) | -0.50'' (*)  |
| VLDL-C       | -0.39' (*)   | 0.50'' (ns)    | -0.34' (ns)    |            | -0.60'' (ns) |
| HDL-C        | -0.7 (ns)    | -0.86'' (****) | -0.53'' (*)    | -0.22 (ns) |              |

Footnotes are the same as in Supplement table 7

**Supplement Table 9.** Pearson correlation and partial correlation coefficients of lipid profile parameters and SIC exosomes in the group "After therapy"

|              | SIC Exomeres | Cholesterol  | LDL-C       | VLDL-C      | HDL-C       |
|--------------|--------------|--------------|-------------|-------------|-------------|
| SIC Exosomes |              | 0.23 (ns)    | -0.30' (ns) | -0.041 (ns) | 0.17 (ns)   |
| Cholesterol  | 0.46'' (ns)  |              | 0.36' (ns)  | 0.40 (ns)   | 0.16 (ns)   |
| LDL-C        | -0.38' (ns)  | 0.40' (ns)   |             | 0.40' (ns)  | -0.38' (ns) |
| VLDL-C       | -0.08 (ns)   | 0.38' (ns)   | 0.08 (ns)   |             | -0.33' (ns) |
| HDL-C        | -0.09 (ns)   | 0.37' (****) | -0.41' (*)  | -0.35' (ns) |             |

Footnotes are the same as in Supplement table 7
